# Supplementary material for: Facile synthesis of Au/Al2O3nanocomposites for improving the detection sensitivity of adenosine triphosphate
Source: Royal Society of Chemistry journal article supplement (doi:10.1039/c7ra03683c), 2017-01-01
Supplement: c7ra03683c1.pdf [file c7ra03683c1.pdf]

# Supplementary Material

## **Facile Synthesis of Au/Al<sub>2</sub>O<sub>3</sub> Nanocomposites for Improving Detection Sensitivity of Adenosine Triphosphate**

Li Xu, Qin Xu, Xiaoyu Guo, Ye Ying, Yiping Wu\*, Ying Wen, Haifeng Yang\*

*The Education Ministry Key Lab of Resource Chemistry, Shanghai Key Laboratory of Rare Earth Functional Materials, Shanghai Municipal Education Committee Key Laboratory of Molecular Imaging Probes and Sensors and Department of Chemistry, Shanghai Normal University, Shanghai, 200234, China*

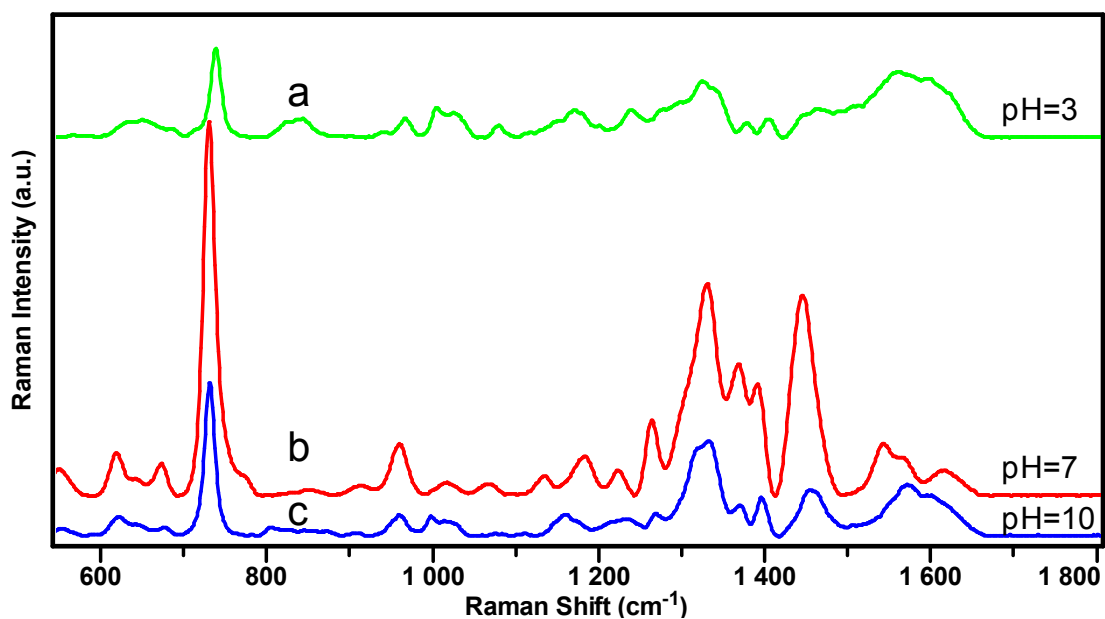

Fig. S1 SERS spectra of 10<sup>-4</sup> M ATP with different pH: (a) pH=3, (b) pH=7 and (c) pH=10.

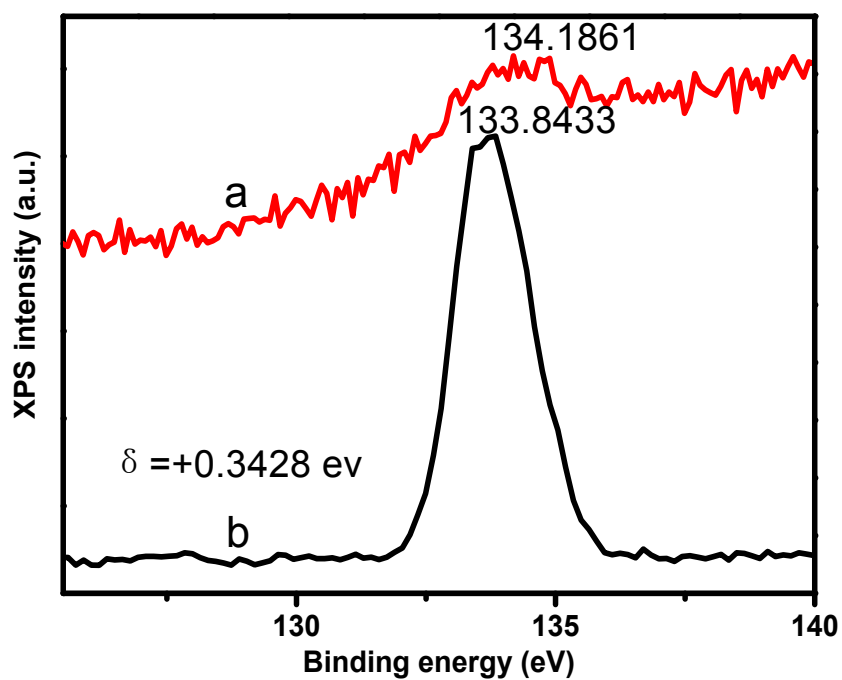

Fig. S2 XPS patterns of P 2p of (a) ATP adsorbed on Al<sub>2</sub>O<sub>3</sub>, (b) pure ATP

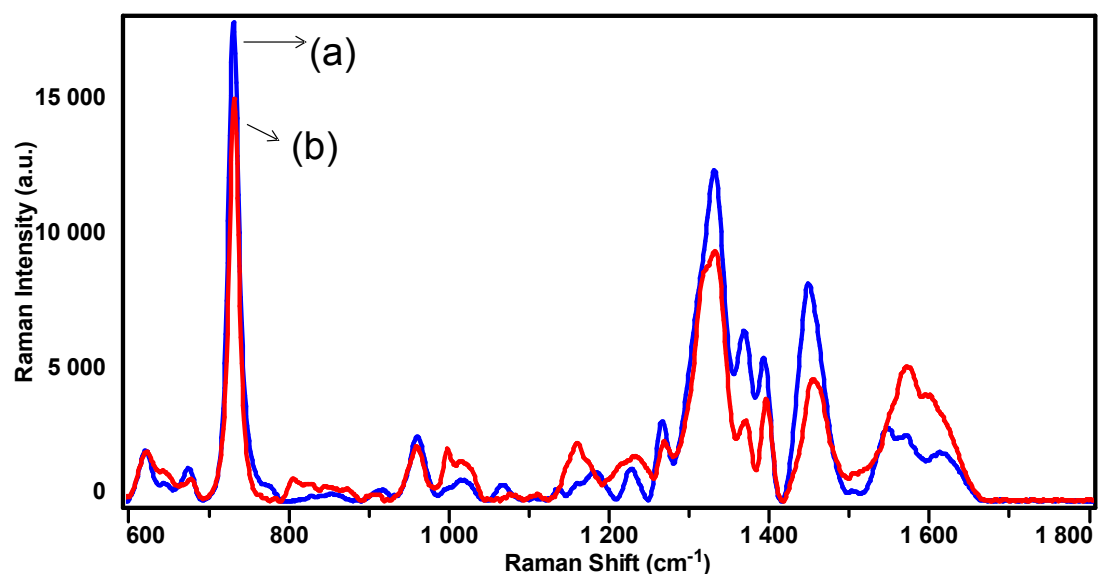

Fig. S3 SERS spectra of (a)  $5 \times 10^{-5}$  M ATP and (b)  $5 \times 10^{-5}$  M adenosine, recorded on Au/Al<sub>2</sub>O<sub>3</sub> NCs
